# Supplementary material for: B Cell Repertoire Analysis Identifies New Antigenic Domains on Glycoprotein B of Human Cytomegalovirus which Are Target of Neutralizing Antibodies
Source: PubMed Central journal article supplement (PMC3154849; doi:10.1371/journal.ppat.1002172), 2011-08-11
Supplement: ppat.1002172.s006.pdf [file ppat.1002172.s006.pdf]

Supplementary Table 1: V gene usage and CDR sequences of monoclonal anti-gB antibodies

| Clone       | V-GENE and allele* | CDR1*       | CDR2*    | CDR3*                    |
|-------------|--------------------|-------------|----------|--------------------------|
| heavy chain |                    |             |          |                          |
| SM10        | IGHV4-39*01        | GGSIGVGDSY  | IYFTGTT  | ARHAYDFWVRGVSWIAP        |
| SM12        | IGHV4-59*01        | GGSMSSYY    | IYYSGST  | ARDVRSSPPVYYYYGMDV       |
| 2C2         | IGHV4-59*01        | GAPIRSYY    | INTNGRS  | ATASQHRYDSLTSYRYYPYVMDV  |
| 1G2         | IGHV4-39*01        | GASIDRSTYY  | IYYNGRA  | ATRWNYFFDFDY             |
| SM1-6       | IGHV1-2*02         | GYTFTGY Y   | INPNSGGT | ARDGAKTVTTSGMSLLYYYDVMDI |
| SM3-1       | IGHV1-2*02         | GYTFTDYY    | INPHSGGT | ARDGAKTVTTFGASLLYYDIMDV  |
| SM4-5       | IGHV1-2*02         | GFTLSDHY    | INPQSGGT | ARDGAKTVSNSGLGLLYYHSRLDA |
| SM5-1       | IGHV1-2*02         | GYSLKDHY    | INPQSGGT | ARDGAKTVSNSGLSLLYYHNRLDA |
| SM6-5       | IGHV1-2*02         | GYTFTDYY    | INPNTGGT | ARDGAKMTTSGLSLLYYYDVMDV  |
| SM11-17     | IGHV1-2*02         | GYTFTDFY    | INPHSGGT | ARDGAKTVTTSGMSLLYYYDVMDI |
| light chain |                    |             |          |                          |
| SM10        | IGKV2-28*01        | QTLLHSNGNNY | YAS      | MQALQSPLT                |
| SM12        | IGKV2-28*01        | QSLLSNGYNY  | LGS      | MQALQTPRT                |
| 2C2         | IGKV1-33*01        | QDIRKS      | DAS      | QHYDNFPPT                |
| 1G2         | IGLV1-47*01        | SSNIETNY    | RNN      | GTWDDNSWV                |
| SM1-6       | IGLV1-51*01        | SSNIGKNY    | DNN      | GTWDSLSV V               |
| SM3-1       | IGLV1-51*01        | SSNIGKNY    | DNN      | ATWDRSLSV V              |
| SM4-5       | IGLV1-51*01        | RSNIGKNY    | DNN      | GTWDSLSAYV               |
| SM5-1       | IGLV1-51*01        | SSNIGKNY    | DNN      | GTPDRSLSV I              |
| SM6-5       | IGLV1-51*01        | SSNIGKNY    | DNN      | ATWDSLSGVV               |

\* Assignments of V-genes and CDR regions were performed with IMGT/V-QUEST (<http://www.imgt.org>).

The light chain sequence of clone SM11-17 could not be obtained.
